# Supplementary material for: Comparative Analysis of the Effect of Inorganic and Organic Chemicals with Silver Nanoparticles on Soybean under Flooding Stress
Source: MDPI journal article supplement (doi:10.3390/ijms21041300), 2020-02-14
Supplement: s1 [file s1]

Supplemental Table 1. List of identified proteins in flooding-stressed soybean treated with silver NPs, nicotinic acid, and KNO<sub>3</sub> compared to control.

| No. | Accession  | Description                                              | Coverage [%] | MP <sup>a)</sup> | # AAs <sup>b)</sup> | MW [kDa] <sup>c)</sup> | calc. pI <sup>d)</sup> | Ratio | <i>p</i> -Value | MapMan bin <sup>e)</sup> |
|-----|------------|----------------------------------------------------------|--------------|------------------|---------------------|------------------------|------------------------|-------|-----------------|--------------------------|
| 1.  | E2FKH7     | Sieve element occlusion f                                | 32           | 19               | 698                 | 80                     | 6.83                   | 100   | 0.0000          | 35.2                     |
| 2.  | A0A0R0G789 | Uncharacterized protein                                  | 43           | 19               | 499                 | 56.1                   | 9.01                   | 100   | 0.0000          | 26.3                     |
| 3.  | I1LTQ5     | AP-2 complex subunit alpha                               | 25           | 17               | 1020                | 113.7                  | 6.25                   | 100   | 0.0000          | 31.4                     |
| 4.  | O81273     | Biotin carboxylase                                       | 43           | 16               | 539                 | 58.8                   | 7.5                    | 100   | 0.0000          | 11.1.1                   |
| 5.  | K7MR36     | Citrate synthase                                         | 34           | 13               | 514                 | 56.6                   | 9.38                   | 100   | 0.0000          | 6.1                      |
| 6.  | K7LST9     | Uncharacterized protein                                  | 26           | 12               | 539                 | 61.6                   | 6.65                   | 100   | 0.0000          | 35.1.19                  |
| 7.  | I1KNL7     | Uncharacterized protein                                  | 48           | 11               | 409                 | 42.3                   | 7.93                   | 100   | 0.0000          | 13.2.4.5                 |
| 8.  | A0A0R0J5W4 | Cysteine synthase                                        | 46           | 11               | 389                 | 41.3                   | 7.93                   | 100   | 0.0000          | 13.1.5.3.1               |
| 9.  | A0A0R0KHI0 | Lipoxygenase domain-containing protein                   | 45           | 10               | 236                 | 27.2                   | 6.65                   | 100   | 0.0000          | 17.7.1.2                 |
| 10. | I1LXN6     | Uncharacterized protein                                  | 28           | 10               | 404                 | 46.2                   | 6.55                   | 100   | 0.0000          | 29.1                     |
| 11. | I1LZ51     | Uncharacterized protein                                  | 24           | 10               | 488                 | 54.1                   | 7.37                   | 100   | 0.0000          | 13.1.3.5.5               |
| 12. | I1KP69     | Uncharacterized protein                                  | 54           | 10               | 253                 | 27.8                   | 8.18                   | 100   | 0.0000          | 9.1.1.5                  |
| 13. | C6SVD7     | Phi class glutathione S-transferase                      | 73           | 10               | 215                 | 24.8                   | 6.07                   | 100   | 0.0000          | 26.9                     |
| 14. | Q5K6N6     | Mitogen-activated protein kinase                         | 38           | 10               | 391                 | 44.8                   | 5.86                   | 100   | 0.0000          | 30.6                     |
| 15. | I1LHP2     | Uncharacterized protein                                  | 31           | 9                | 382                 | 43.2                   | 5.68                   | 100   | 0.0000          | 29.1.1                   |
| 16. | K7MJR6     | Uncharacterized protein                                  | 19           | 9                | 803                 | 91                     | 6.51                   | 100   | 0.0000          | 35.2                     |
| 17. | I1J8S9     | Uncharacterized protein                                  | 61           | 8                | 213                 | 24.1                   | 5.34                   | 100   | 0.0000          | 23.4.99                  |
| 18. | K7KQ62     | FMN hydroxy acid dehydrogenase domain-containing protein | 29           | 8                | 298                 | 32.3                   | 9.28                   | 100   | 0.0000          | 1.2.2                    |
| 19. | K7KEG4     | Uncharacterized protein                                  | 24           | 7                | 483                 | 54.8                   | 8.24                   | 100   | 0.0000          | 17.3.1.2.3               |
| 20. | I1KZI6     | ENTH domain-containing protein                           | 10           | 6                | 922                 | 98.5                   | 5.87                   | 100   | 0.0000          | 35.1.2.1                 |
| 21. | I1M393     | Thioredoxin domain-containing protein                    | 28           | 5                | 182                 | 19.6                   | 8.94                   | 100   | 0.0000          | 21.1                     |
| 22. | D3G9M7     | Calcium dependent protein kinase                         | 11           | 5                | 579                 | 64.9                   | 5.43                   | 100   | 0.0000          | 30.3                     |
| 23. | I1M4Q3     | Uncharacterized protein                                  | 6            | 5                | 982                 | 110.1                  | 7.55                   | 100   | 0.0000          | 30.11                    |
| 24. | C6TCW7     | GrpE protein homolog                                     | 27           | 5                | 290                 | 32.4                   | 5.59                   | 100   | 0.0000          | 29.6                     |
| 25. | I1JG92     | Uncharacterized protein                                  | 8            | 4                | 759                 | 86.3                   | 6.23                   | 100   | 0.0000          | 35.2                     |
| 26. | K7LM54     | Rab-GAP TBC domain-containing protein                    | 7            | 4                | 830                 | 93.2                   | 4.83                   | 100   | 0.0000          | 30.5                     |
| 27. | I1KXP5     | A deaminase domain-containing protein                    | 7            | 4                | 866                 | 99                     | 6.3                    | 100   | 0.0000          | 23.2                     |
| 28. | I1JLR9     | Uncharacterized protein                                  | 8            | 4                | 886                 | 98.7                   | 5.02                   | 100   | 0.0000          | 33.99                    |
| 29. | K7K2V9     | MI domain-containing protein                             | 3            | 4                | 1822                | 196.5                  | 7.36                   | 100   | 0.0000          | 29.2.3                   |

|     |            |                                                        |    |   |      |       |      |     |        |            |
|-----|------------|--------------------------------------------------------|----|---|------|-------|------|-----|--------|------------|
| 30. | K7MU41     | Uncharacterized protein                                | 9  | 4 | 596  | 66.9  | 8.53 | 100 | 0.0000 | 20.2.3     |
| 31. | A0A0R0IQJ4 | Uncharacterized protein                                | 15 | 4 | 285  | 32.6  | 7.87 | 100 | 0.0000 | 26.9       |
| 32. | I1J7U8     | Epimerase domain-containing protein                    | 10 | 3 | 438  | 48.6  | 9.85 | 100 | 0.0000 | 10.1.6     |
| 33. | A0A0R0J7H3 | RmlD sub bind domain-containing protein                | 12 | 3 | 350  | 38.9  | 8.69 | 100 | 0.0000 | 35.1       |
| 34. | K7KW60     | Uncharacterized protein                                | 14 | 3 | 295  | 31.8  | 7.69 | 100 | 0.0000 | 13.1.5.1.3 |
| 35. | I1MPF0     | Glycosyltransferase                                    | 7  | 3 | 473  | 52.2  | 6.14 | 100 | 0.0000 | 26.2       |
| 36. | K7MP06     | Uncharacterized protein                                | 2  | 3 | 1197 | 137   | 6.42 | 100 | 0.0000 | 27.1       |
| 37. | I1MDR1     | Uncharacterized protein                                | 10 | 3 | 516  | 58.2  | 6.46 | 100 | 0.0000 | 35.1       |
| 38. | I1J4W0     | Uncharacterized protein                                | 19 | 3 | 221  | 24.3  | 5.99 | 100 | 0.0000 | 35.2       |
| 39. | C6TII4     | Serine/threonine-protein phosphatase                   | 13 | 3 | 316  | 35.9  | 5.36 | 100 | 0.0000 | 29.4       |
| 40. | I1KAG4     | Putative methyl transferase                            | 6  | 3 | 835  | 93.6  | 5.26 | 100 | 0.0000 | 20.2.3     |
| 41. | I1LBY1     | Protein kinase domain-containing protein               | 7  | 3 | 700  | 78    | 6.57 | 100 | 0.0000 | 29.4       |
| 42. | A0A368UKK5 | Peroxidase                                             | 12 | 3 | 518  | 57.2  | 7.69 | 100 | 0.0000 | 30.5       |
| 43. | I1MRW2     | Importin N-terminal domain-containing protein          | 3  | 2 | 1110 | 123.7 | 4.83 | 100 | 0.0000 | 29.3.1     |
| 44. | I1J975     | Uncharacterized protein                                | 12 | 2 | 174  | 19.6  | 8.57 | 100 | 0.0000 | 30.8       |
| 45. | I1N5E0     | Uncharacterized protein                                | 3  | 2 | 1118 | 123   | 9    | 100 | 0.0000 | 35.2       |
| 46. | A0A0R0GCU0 | PHD-type domain-containing protein                     | 2  | 2 | 1253 | 138.2 | 6.7  | 100 | 0.0000 | 33.99      |
| 47. | C6TIW1     | Uncharacterized protein                                | 8  | 2 | 301  | 32.5  | 6.15 | 100 | 0.0000 | 35.1       |
| 48. | I1M926     | Cytosolic Fe-S cluster assembly factor NBP35           | 8  | 2 | 355  | 38.2  | 4.94 | 100 | 0.0000 | 18.7       |
| 49. | C6SZF0     | AAI domain-containing protein                          | 20 | 2 | 93   | 10    | 8.87 | 100 | 0.0000 | 26.21      |
| 50. | I1KS28     | Uncharacterized protein                                | 10 | 2 | 96   | 11    | 9.38 | 100 | 0.0000 | 35.2       |
| 51. | I1LYG4     | t-SNARE coiled-coil homology domain-containing protein | 7  | 2 | 269  | 30.3  | 6.58 | 100 | 0.0000 | 31.4       |
| 52. | I1K559     | Uncharacterized protein                                | 3  | 2 | 687  | 79.3  | 6.62 | 100 | 0.0000 | 27.3.99    |
| 53. | K7KYQ1     | SUN domain-containing protein                          | 4  | 2 | 605  | 69    | 6    | 100 | 0.0000 | 35.2       |
| 54. | I1M7R6     | Uncharacterized protein                                | 4  | 2 | 535  | 59.7  | 6.92 | 100 | 0.0000 | 35.1       |
| 55. | I1J8T9     | Glucose-6-phosphate 1-epimerase                        | 6  | 2 | 311  | 33.8  | 5.88 | 100 | 0.0000 | 3.5        |
| 56. | K7M3M7     | Uncharacterized protein                                | 9  | 2 | 333  | 35    | 7.77 | 100 | 0.0000 | 7.1.3      |
| 57. | I1N123     | PsbP domain-containing protein                         | 7  | 2 | 265  | 28.4  | 7.87 | 100 | 0.0000 | 1.1.1.2    |
| 58. | C6TL77     | Uncharacterized protein                                | 9  | 2 | 262  | 29.8  | 6.93 | 100 | 0.0000 | 27.2       |
| 59. | C6TME8     | Uncharacterized protein                                | 12 | 2 | 220  | 25.1  | 9.01 | 100 | 0.0000 | 31.4       |
| 60. | I1K0I8     | PPC domain-containing protein                          | 13 | 2 | 327  | 33.4  | 8.95 | 100 | 0.0000 | 27.3.67    |

|     |            |                                                 |    |    |      |       |      |        |        |              |
|-----|------------|-------------------------------------------------|----|----|------|-------|------|--------|--------|--------------|
| 61. | IILP93     | Phospholipid scramblase                         | 7  | 2  | 349  | 40.2  | 9.57 | 100    | 0.0000 | 35.1         |
| 62. | I1KIH5     | Methyl transferase                              | 5  | 2  | 641  | 73.1  | 8.16 | 100    | 0.0000 | 20.2.3       |
| 63. | I1K2W9     | FAD-binding PCMH-type domain-containing protein | 3  | 2  | 536  | 60.7  | 9.2  | 100    | 0.0000 | 26.8         |
| 64. | I1K665     | Trehalase                                       | 4  | 2  | 580  | 65.7  | 5.86 | 100    | 0.0000 | 3.2.4        |
| 65. | I1MK29     | Uncharacterized protein                         | 6  | 2  | 416  | 45.2  | 7.78 | 100    | 0.0000 | 27.1.1       |
| 66. | I1JD34     | Uncharacterized protein                         | 5  | 2  | 472  | 51.2  | 8.32 | 100    | 0.0000 | 23.2         |
| 67. | C6T1L7     | Bet v 1 domain-containing protein               | 20 | 2  | 155  | 17.6  | 8.12 | 100    | 0.0000 | 20.2.99      |
| 68. | K7KUR7     | RRM domain-containing protein                   | 3  | 2  | 1176 | 128.8 | 6.29 | 49.322 | 0.0000 | 29.5.7       |
| 69. | I1JMM6     | Uncharacterized protein                         | 25 | 7  | 445  | 48.9  | 5.16 | 29.168 | 0.0000 | 31.1         |
| 70. | I1N5X2     | Peroxidase                                      | 35 | 7  | 323  | 35.5  | 8.29 | 14.952 | 0.0000 | 26.12        |
| 71. | I1KQU5     | Malate dehydrogenase                            | 28 | 4  | 356  | 37.4  | 8.29 | 14.739 | 0.0000 | 6.3          |
| 72. | A0A0R0J569 | Uncharacterized protein                         | 5  | 2  | 422  | 46    | 7.78 | 12.666 | 0.0000 | 27.1.1       |
| 73. | C6SX42     | Glutaredoxin domain-containing protein          | 27 | 3  | 166  | 17.9  | 9.07 | 9.941  | 0.0000 | 21.4         |
| 74. | I1MLU4     | Uncharacterized protein                         | 17 | 4  | 372  | 38.8  | 7.66 | 9.719  | 0.0000 | 27.4         |
| 75. | K7N1D8     | AMP-binding domain-containing protein           | 39 | 17 | 725  | 79.7  | 7.23 | 8.88   | 0.0000 | 11.1.9       |
| 76. | K7KJI6     | TPR REGION domain-containing protein            | 5  | 2  | 738  | 82.2  | 4.81 | 8.484  | 0.0000 | 29.3.5       |
| 77. | I1L1F3     | Uncharacterized protein                         | 50 | 11 | 242  | 28.3  | 9.83 | 8.363  | 0.0000 | 29.2.1.2.2.7 |
| 78. | I1L280     | Uncharacterized protein                         | 26 | 3  | 150  | 17.1  | 7.81 | 7.672  | 0.0000 | 9.1.1        |
| 79. | K7MK51     | Uncharacterized protein                         | 13 | 6  | 817  | 87.6  | 6.98 | 7.135  | 0.0000 | 29.5.1       |
| 80. | K7KYV7     | Lipoxygenase domain-containing protein          | 34 | 5  | 170  | 19.2  | 8.94 | 6.338  | 0.0000 | 17.7.1.2     |
| 81. | I1LSY9     | Usp domain-containing protein                   | 27 | 6  | 256  | 27.6  | 6.19 | 6.096  | 0.0000 | 20.2.99      |
| 82. | I1KMX8     | Uncharacterized protein                         | 28 | 2  | 121  | 12.9  | 4.78 | 5.944  | 0.0000 | 35.2         |
| 83. | C6TCX5     | Peptidase M24 domain-containing protein         | 49 | 13 | 394  | 43.5  | 6.7  | 5.817  | 0.0000 | 29.5         |
| 84. | I1NFG9     | Uncharacterized protein                         | 52 | 18 | 585  | 65.5  | 5.07 | 5.094  | 0.0000 | 29.4         |
| 85. | I1NED8     | Uncharacterized protein                         | 1  | 2  | 1296 | 134.5 | 8.78 | 5.091  | 0.0000 | 35.2         |
| 86. | I1K4M6     | C2 domain-containing protein                    | 17 | 23 | 2151 | 229.2 | 5.36 | 5.018  | 0.0000 | 35.1.19      |
| 87. | I1KY46     | Uncharacterized protein                         | 6  | 3  | 465  | 52.3  | 8.44 | 4.966  | 0.0000 | 16.2         |
| 88. | I1M3U3     | AB hydrolase-1 domain-containing protein        | 15 | 4  | 311  | 34.7  | 5.29 | 4.816  | 0.0000 | 26.1         |
| 89. | I1MXX5     | Proteasome subunit alpha type                   | 60 | 11 | 284  | 31    | 5.19 | 4.496  | 0.0000 | 29.5.11.20   |
| 90. | Q948P6     | Ferritin-3, chloroplastic                       | 27 | 5  | 256  | 28.9  | 5.52 | 4.322  | 0.0000 | 15.2         |
| 91. | A0A0R0HPA5 | Uncharacterized protein                         | 39 | 8  | 216  | 24.7  | 6.54 | 4.276  | 0.0000 | 23.4.99      |

|      |        |                                                |    |    |      |       |       |       |        |               |
|------|--------|------------------------------------------------|----|----|------|-------|-------|-------|--------|---------------|
| 92.  | I1M290 | KOW domain-containing protein                  | 29 | 4  | 146  | 16.7  | 10.92 | 4.178 | 0.0000 | 29.2.1.2.2.26 |
| 93.  | I1MAV1 | Glycosyltransferase                            | 9  | 2  | 488  | 54.5  | 5.54  | 4.123 | 0.0000 | 26.2          |
| 94.  | I1LC70 | GLTP domain-containing protein                 | 22 | 4  | 202  | 22.5  | 6.9   | 4.091 | 0.0000 | 11.6          |
| 95.  | I1M675 | Uncharacterized protein                        | 7  | 3  | 686  | 76.6  | 5.55  | 4.016 | 0.0000 | 31.1          |
| 96.  | I1LVY0 | methyl transferase                             | 6  | 3  | 694  | 78.9  | 6.06  | 3.98  | 0.0000 | 20.2.3        |
| 97.  | C6T2F1 | UBIQUITIN CONJUGAT 2 domain-containing protein | 30 | 2  | 148  | 16.5  | 6.92  | 3.973 | 0.0000 | 29.5.11.3     |
| 98.  | I1K6Z1 | HECT domain-containing protein                 | 5  | 6  | 1895 | 204.1 | 5.82  | 3.791 | 0.0001 | 29.5.11.4.1   |
| 99.  | I1K5C0 | TPR REGION domain-containing protein           | 14 | 6  | 587  | 63.8  | 8.87  | 3.724 | 0.0000 | 29.3.3        |
| 100. | I1NEH6 | Aldo ket red domain-containing protein         | 66 | 13 | 328  | 36.6  | 7.74  | 3.412 | 0.0000 | 34.15         |
| 101. | I1JCF9 | VWFA domain-containing protein                 | 37 | 10 | 405  | 43    | 4.67  | 3.366 | 0.0001 | 29.5.11       |
| 102. | I1MLV5 | Fe2OG dioxygenase domain-containing protein    | 28 | 6  | 312  | 35.8  | 5.69  | 3.215 | 0.0000 | 26.14         |
| 103. | I1K6Q2 | Uncharacterized protein                        | 8  | 2  | 433  | 48.3  | 5.78  | 3.19  | 0.0000 | 35.1          |
| 104. | I1L0D9 | Peroxidase                                     | 32 | 6  | 349  | 38    | 7.3   | 3.025 | 0.0000 | 26.12         |
| 105. | K7MVS5 | Protein kinase domain-containing protein       | 11 | 4  | 671  | 75.2  | 6.7   | 2.885 | 0.0000 | 29.4          |
| 106. | I1LGL4 | Uncharacterized protein                        | 22 | 5  | 410  | 45.1  | 7.2   | 2.883 | 0.0000 | 35.1          |
| 107. | I1JKM6 | Uncharacterized protein                        | 31 | 5  | 289  | 32.6  | 5.29  | 2.845 | 0.0000 | #N/A          |
| 108. | C6T482 | Uncharacterized protein                        | 54 | 2  | 89   | 10.6  | 9.35  | 2.841 | 0.0000 | 35.2          |
| 109. | I1MJ19 | Citrate synthase                               | 58 | 18 | 472  | 52.5  | 8.47  | 2.806 | 0.0000 | 8.1.2         |
| 110. | I1K0S4 | Uncharacterized protein                        | 9  | 2  | 281  | 30.5  | 7.09  | 2.69  | 0.0000 | 35.2          |
| 111. | I1JKU5 | MSP domain-containing protein                  | 20 | 4  | 241  | 26.7  | 7.75  | 2.664 | 0.0008 | 29.3.4.1      |
| 112. | I1JDM8 | W2 domain-containing protein                   | 12 | 4  | 441  | 48.7  | 6.64  | 2.654 | 0.0019 | 29.2.3        |
| 113. | I1MKY3 | Uncharacterized protein                        | 27 | 2  | 112  | 12.6  | 6.74  | 2.653 | 0.0000 | #N/A          |
| 114. | I1MXJ1 | Uncharacterized protein                        | 25 | 10 | 777  | 82.2  | 7.09  | 2.636 | 0.0000 | 29.5.1        |
| 115. | I1MJ28 | Uncharacterized protein                        | 62 | 29 | 591  | 62.8  | 5.87  | 2.564 | 0.0000 | 29.6          |
| 116. | I1LES5 | PB1 domain-containing protein                  | 5  | 3  | 707  | 76.5  | 6.18  | 2.531 | 0.0139 | 35.1          |
| 117. | I1M3W1 | Ribosomal S7 domain-containing protein         | 51 | 10 | 204  | 22.6  | 9.48  | 2.526 | 0.0000 | 29.2.1.2.1.5  |
| 118. | I1KBY3 | UVR domain-containing protein                  | 53 | 36 | 922  | 102.4 | 6.46  | 2.486 | 0.0020 | 29.5.5        |
| 119. | I1JWV7 | Uncharacterized protein                        | 43 | 8  | 262  | 30.2  | 4.31  | 2.483 | 0.0002 | 28.1          |
| 120. | C6TK28 | Serine/threonine-protein phosphatase           | 54 | 10 | 303  | 34.8  | 5.01  | 2.403 | 0.0000 | 29.4          |
| 121. | I1L738 | Peroxidase                                     | 10 | 2  | 322  | 34.2  | 5.27  | 2.368 | 0.0003 | 26.12         |
| 122. | I1M8S3 | Uncharacterized protein                        | 27 | 11 | 774  | 82.1  | 7.39  | 2.349 | 0.0000 | 29.5.1        |

|      |            |                                                 |    |    |     |      |      |       |        |              |
|------|------------|-------------------------------------------------|----|----|-----|------|------|-------|--------|--------------|
| 123. | I1MY43     | Vacuolar protein sorting-associated protein 35  | 4  | 2  | 798 | 90.3 | 5.43 | 2.326 | 0.0231 | 29.3.4.3     |
| 124. | K7KLB5     | Uncharacterized protein                         | 18 | 7  | 557 | 62.4 | 4.88 | 2.288 | 0.0361 | 34.99        |
| 125. | I1L2J3     | Uncharacterized protein                         | 7  | 3  | 600 | 66.7 | 7.18 | 2.287 | 0.0000 | 28.1         |
| 126. | I1JK28     | FSH1 domain-containing protein                  | 19 | 4  | 268 | 30.1 | 6.24 | 2.273 | 0.0205 | 35.2         |
| 127. | I1N2G8     | Uncharacterized protein                         | 56 | 2  | 55  | 5.8  | 4.32 | 2.164 | 0.0015 | 15.2         |
| 128. | C6TDZ1     | Uncharacterized protein                         | 53 | 6  | 286 | 30.7 | 6.67 | 2.143 | 0.0000 | 34.19.1      |
| 129. | I1JUI8     | PsbP domain-containing protein                  | 6  | 2  | 298 | 34.3 | 7.24 | 2.128 | 0.0034 | 1.1.1.2      |
| 130. | C6SZJ5     | FAS1 domain-containing protein                  | 14 | 2  | 245 | 26.3 | 9.57 | 2.061 | 0.0000 | 10.5.1       |
| 131. | I1JBK4     | Uncharacterized protein                         | 32 | 3  | 160 | 17.5 | 5.19 | 2.023 | 0.0002 | 35.2         |
| 132. | C6SVL0     | Uncharacterized protein                         | 21 | 3  | 200 | 21.8 | 5.33 | 2.012 | 0.0000 | 20.1.7.6.1   |
| 133. | I1NGL3     | Uncharacterized protein                         | 32 | 11 | 466 | 52.2 | 7.3  | 2.009 | 0.0039 | 14.1         |
| 134. | A0A0R0JSZ6 | Ferritin                                        | 36 | 2  | 89  | 10.2 | 5.69 | 2.008 | 0.0005 | 15.2         |
| 135. | I1L776     | Uncharacterized protein                         | 29 | 6  | 357 | 39.9 | 5.29 | 1.987 | 0.0074 | 16.2.1.9     |
| 136. | C6SW49     | Uncharacterized protein                         | 30 | 2  | 125 | 13.5 | 7.97 | 1.987 | 0.0260 | 35.2         |
| 137. | I1JKM1     | Uncharacterized protein                         | 45 | 9  | 289 | 32.3 | 5.17 | 1.942 | 0.0000 | #N/A         |
| 138. | I1JAN2     | Uncharacterized protein                         | 10 | 6  | 859 | 97.1 | 4.88 | 1.94  | 0.0115 | 35.1         |
| 139. | C6T034     | EF1 GNE domain-containing protein               | 76 | 14 | 223 | 24.3 | 4.68 | 1.914 | 0.0000 | 29.2.4       |
| 140. | I1K4S0     | Uncharacterized protein                         | 57 | 13 | 241 | 27.5 | 6.44 | 1.887 | 0.0015 | 9.9          |
| 141. | A0A0R0FQV9 | Xyloglucan endotransglucosylase/hydrolase       | 40 | 13 | 290 | 33.7 | 6.93 | 1.869 | 0.0000 | 10.7         |
| 142. | Q2LAL4     | Cytochrome P450 monooxygenase CYP83E8           | 43 | 14 | 499 | 57.4 | 7.96 | 1.841 | 0.0000 | 16.5.1.1.4.1 |
| 143. | A0A0R0FHG0 | AAI domain-containing protein                   | 34 | 3  | 95  | 9.9  | 8.41 | 1.838 | 0.0000 | 26.21        |
| 144. | C6TAH8     | Uncharacterized protein                         | 49 | 11 | 276 | 29.1 | 9.11 | 1.832 | 0.0058 | 34.2         |
| 145. | I1K672     | Importin N-terminal domain-containing protein   | 41 | 21 | 870 | 96.3 | 4.78 | 1.814 | 0.0001 | 29.3.1       |
| 146. | I1L377     | Uncharacterized protein                         | 19 | 3  | 206 | 22.5 | 5.82 | 1.805 | 0.0002 | 27.3.99      |
| 147. | A0A0R0K0E5 | FAD-binding PCMH-type domain-containing protein | 8  | 4  | 530 | 59.2 | 7.85 | 1.803 | 0.0049 | 26.8         |
| 148. | I1K1P3     | Uncharacterized protein                         | 8  | 2  | 366 | 39.6 | 8.98 | 1.795 | 0.0043 | 13.2.3.4     |
| 149. | I1MGH2     | Fn3 like domain-containing protein              | 18 | 9  | 775 | 84   | 8.15 | 1.78  | 0.0000 | 10.6.2       |
| 150. | C6T2H1     | Flavodoxin-like domain-containing protein       | 60 | 9  | 203 | 21.7 | 6.95 | 1.776 | 0.0025 | 11.8         |
| 151. | A0A0R0KVX2 | Fe2OG dioxygenase domain-containing protein     | 18 | 4  | 349 | 39.7 | 6.84 | 1.697 | 0.0001 | 35.1         |
| 152. | A0A0R0GAQ0 | Peptidase A1 domain-containing protein          | 7  | 3  | 472 | 50.1 | 8.75 | 1.692 | 0.0000 | 27.3.99      |
| 153. | K7MPG5     | Uncharacterized protein                         | 28 | 6  | 389 | 42.4 | 8.29 | 1.689 | 0.0006 | 13.1.1.3.11  |

|      |            |                                                        |    |    |     |      |      |       |        |            |
|------|------------|--------------------------------------------------------|----|----|-----|------|------|-------|--------|------------|
| 154. | A0A0R4J4M3 | FAS1 domain-containing protein                         | 13 | 2  | 262 | 27.8 | 8.88 | 1.689 | 0.0010 | 10.5.1     |
| 155. | I1KW34     | Uncharacterized protein                                | 29 | 8  | 415 | 45   | 5.02 | 1.677 | 0.0113 | 29.5       |
| 156. | I1JEY3     | Fe2OG dioxygenase domain-containing protein            | 22 | 3  | 352 | 40.8 | 6.37 | 1.67  | 0.0030 | 21.2       |
| 157. | I1LTS0     | Arogenate dehydratase                                  | 10 | 3  | 425 | 46.2 | 7.84 | 1.67  | 0.0180 | 13.1.6.3.1 |
| 158. | I1JPW6     | Uncharacterized protein                                | 13 | 3  | 314 | 36.2 | 9.44 | 1.653 | 0.0008 | 27.1.1     |
| 159. | C6SYN6     | N-acetyltransferase domain-containing protein          | 12 | 2  | 165 | 18.6 | 8.6  | 1.645 | 0.0221 | 26.24      |
| 160. | C6TIC3     | Uncharacterized protein                                | 50 | 9  | 286 | 30.7 | 8.65 | 1.644 | 0.0001 | 34.19.1    |
| 161. | I1MRM5     | Bet v 1 domain-containing protein                      | 55 | 6  | 157 | 17.1 | 5.07 | 1.638 | 0.0001 | 20.2.99    |
| 162. | I1MNV4     | t-SNARE coiled-coil homology domain-containing protein | 10 | 2  | 308 | 34.8 | 7.94 | 1.617 | 0.0294 | 31.4       |
| 163. | A0A0R0F259 | Uncharacterized protein                                | 46 | 17 | 608 | 65.2 | 6.21 | 1.61  | 0.0013 | 5.2        |
| 164. | I1LZR2     | AAI domain-containing protein                          | 19 | 3  | 227 | 23.5 | 8.79 | 1.609 | 0.0005 | 26.21      |
| 165. | I1N4U1     | 6-phosphogluconate dehydrogenase, decarboxylating      | 69 | 27 | 486 | 53.6 | 5.9  | 1.606 | 0.0004 | 7.1.3      |
| 166. | A0A0R0INP8 | Peroxidase                                             | 29 | 8  | 321 | 34.5 | 8.9  | 1.596 | 0.0000 | 26.12      |
| 167. | K7LE13     | Abhydrolase 3 domain-containing protein                | 12 | 3  | 324 | 36.6 | 5.11 | 1.593 | 0.0056 | 35.1       |
| 168. | I1JSR6     | Uncharacterized protein                                | 13 | 3  | 349 | 39.2 | 6.04 | 1.591 | 0.0046 | 29.5.3     |
| 169. | C6SXX8     | Phytoeyanin domain-containing protein                  | 32 | 2  | 121 | 12.9 | 9.5  | 1.59  | 0.0000 | 26.19      |
| 170. | I1N5H2     | Uncharacterized protein                                | 78 | 12 | 181 | 20.6 | 6.95 | 1.588 | 0.0362 | 29.4       |
| 171. | C6T7F3     | PfkB domain-containing protein                         | 67 | 13 | 341 | 37.5 | 5.47 | 1.578 | 0.0000 | 23.3.2.1   |
| 172. | C6TLJ6     | Uncharacterized protein                                | 67 | 10 | 287 | 30.8 | 8.13 | 1.575 | 0.0318 | 34.19.1    |
| 173. | I1JRU5     | Lipase GDSL domain-containing protein                  | 25 | 6  | 365 | 40.4 | 5.74 | 1.563 | 0.0004 | 26.28      |
| 174. | K7MAQ4     | DUF3700 domain-containing protein                      | 23 | 5  | 293 | 32.1 | 6.79 | 1.562 | 0.0015 | 15         |
| 175. | A0A0R0F156 | Uncharacterized protein                                | 25 | 4  | 265 | 29.4 | 5.4  | 1.56  | 0.0053 | 26.28      |
| 176. | I1MG21     | Peroxidase                                             | 19 | 4  | 349 | 37.6 | 5.82 | 1.559 | 0.0007 | 26.12      |
| 177. | C6SZA9     | Bet v 1 domain-containing protein                      | 63 | 9  | 153 | 17.1 | 5.25 | 1.554 | 0.0003 | 20.2.99    |
| 178. | A0A0R0I2M6 | Peroxidase                                             | 38 | 8  | 355 | 38.5 | 6.04 | 1.531 | 0.0002 | 26.12      |
| 179. | C6SZ93     | AAI domain-containing protein                          | 22 | 2  | 95  | 9.9  | 8.57 | 1.531 | 0.0008 | 26.21      |
| 180. | K7LKJ0     | HMA domain-containing protein                          | 48 | 3  | 81  | 8.6  | 6.6  | 1.527 | 0.0017 | 15.2       |
| 181. | A0A0R0G0H4 | Uncharacterized protein                                | 38 | 5  | 285 | 30.4 | 8.15 | 1.521 | 0.0028 | 34.19.1    |
| 182. | C6SZQ8     | Phytoeyanin domain-containing protein                  | 26 | 2  | 168 | 17.3 | 6.76 | 1.52  | 0.0198 | 26.19      |
| 183. | A0A0R0KTP5 | Uncharacterized protein                                | 38 | 5  | 285 | 30.4 | 8.15 | 1.517 | 0.0292 | 34.19.1    |
| 184. | I1J4B5     | Uncharacterized protein                                | 16 | 4  | 462 | 51   | 6.68 | 1.517 | 0.0378 | 23.4.99    |

|      |            |                                                 |    |    |     |       |      |       |        |            |
|------|------------|-------------------------------------------------|----|----|-----|-------|------|-------|--------|------------|
| 185. | C6SXM4     | Uncharacterized protein                         | 78 | 13 | 181 | 20.7  | 6.95 | 1.516 | 0.0007 | 29.3.4.99  |
| 186. | I1KBS7     | Uncharacterized protein                         | 32 | 10 | 557 | 62.5  | 4.86 | 1.491 | 0.0222 | 34.99      |
| 187. | K7MNX9     | Beta-galactosidase                              | 29 | 13 | 732 | 81.7  | 8.4  | 1.488 | 0.0014 | 26.3.2     |
| 188. | K7N2G0     | Uncharacterized protein                         | 25 | 10 | 787 | 85.8  | 4.37 | 1.487 | 0.0106 | 35.1       |
| 189. | A0A0R4J3D2 | Sm domain-containing protein                    | 33 | 2  | 99  | 10.7  | 4.84 | 1.476 | 0.0036 | 27.1       |
| 190. | I1JS35     | FAD-binding PCMH-type domain-containing protein | 34 | 14 | 595 | 65.5  | 7.2  | 1.475 | 0.0017 | 35.1       |
| 191. | I1LPL0     | FAD-binding PCMH-type domain-containing protein | 52 | 21 | 567 | 66    | 8.22 | 1.471 | 0.0053 | 17.3.1.2.8 |
| 192. | I1N3Z3     | Nudix hydrolase domain-containing protein       | 42 | 11 | 301 | 34    | 6.05 | 1.468 | 0.0383 | 16.1.2.7   |
| 193. | I1KEH1     | Phytoeyanin domain-containing protein           | 20 | 3  | 217 | 23.2  | 7.87 | 1.463 | 0.0323 | 26.19      |
| 194. | C6SXW7     | Uncharacterized protein                         | 29 | 6  | 207 | 23.1  | 4.93 | 1.46  | 0.0011 | 30.4       |
| 195. | C6T265     | Ferredoxin                                      | 50 | 3  | 154 | 16.5  | 5.88 | 1.46  | 0.0259 | 7.3        |
| 196. | K7LJD7     | Uncharacterized protein                         | 40 | 20 | 953 | 104.2 | 4.3  | 1.457 | 0.0029 | 35.1       |
| 197. | I1N5R9     | Formate dehydrogenase, mitochondrial            | 72 | 19 | 375 | 41.3  | 7.34 | 1.452 | 0.0001 | 25.1       |
| 198. | A0A0R0KYU7 | Xyloglucan endotransglucylase/hydrolase         | 45 | 15 | 309 | 36    | 8.25 | 1.452 | 0.0001 | 10.7       |
| 199. | I1L090     | Endoglucanase                                   | 11 | 5  | 618 | 68.3  | 8.68 | 1.44  | 0.0001 | 10.2       |
| 200. | A0A0R4J307 | Uncharacterized protein                         | 17 | 3  | 250 | 25.4  | 6.51 | 1.439 | 0.0001 | 34.19.2    |
| 201. | C6SVX9     | HMA domain-containing protein                   | 82 | 5  | 130 | 13.6  | 4.7  | 1.426 | 0.0098 | 15.2       |
| 202. | A0A0R0KKE2 | Uncharacterized protein                         | 28 | 3  | 106 | 11.8  | 8.87 | 1.426 | 0.0435 | 17.6.3     |
| 203. | I1KUQ6     | Lipoxxygenase                                   | 29 | 18 | 868 | 97.1  | 7.4  | 1.417 | 0.0072 | 17.7.1.2   |
| 204. | I1KHB7     | Germin-like protein                             | 46 | 3  | 225 | 23.8  | 8.46 | 1.415 | 0.0018 | 20.2.99    |
| 205. | I1KYX1     | Uncharacterized protein                         | 52 | 10 | 212 | 23.4  | 5.05 | 1.414 | 0.0003 | 20.1.7.6.1 |
| 206. | I1KC33     | Purple acid phosphatase                         | 41 | 20 | 623 | 70.4  | 6.23 | 1.413 | 0.0003 | 26.13      |
| 207. | I1LKM5     | Pyr redox 2 domain-containing protein           | 43 | 14 | 360 | 39.3  | 9.42 | 1.409 | 0.0003 | 35.1       |
| 208. | I1LP66     | Uncharacterized protein                         | 18 | 12 | 850 | 96.7  | 4.82 | 1.409 | 0.0062 | 35.1       |
| 209. | I1J7T0     | Pectinesterase                                  | 16 | 6  | 515 | 56.5  | 9.01 | 1.406 | 0.0325 | 10.8.99    |
| 210. | I1KDM8     | Malate dehydrogenase                            | 71 | 15 | 345 | 36    | 8.1  | 1.404 | 0.0048 | 8.1.9      |
| 211. | A0A0R4J629 | Uncharacterized protein                         | 17 | 3  | 250 | 25.5  | 6.51 | 1.402 | 0.0025 | 34.19.2    |
| 212. | I1J7B3     | Uncharacterized protein                         | 26 | 7  | 398 | 43.4  | 6.24 | 1.4   | 0.0156 | 26.11.1    |
| 213. | I1M9K9     | Uncharacterized protein                         | 33 | 9  | 366 | 39.8  | 7.74 | 1.399 | 0.0183 | 35.2       |
| 214. | C6SX81     | Ferredoxin                                      | 44 | 4  | 144 | 15.5  | 4.77 | 1.398 | 0.0209 | 1.1.5.2    |
| 215. | I1LUM3     | 14 3 3 domain-containing protein                | 68 | 14 | 260 | 29.3  | 4.82 | 1.394 | 0.0262 | 30.7       |

|      |            |                                                |    |    |      |       |      |       |        |           |
|------|------------|------------------------------------------------|----|----|------|-------|------|-------|--------|-----------|
| 216. | K7LNG5     | Isoflavone reductase                           | 56 | 13 | 318  | 35.6  | 5.73 | 1.38  | 0.0271 | 16.8.5    |
| 217. | A0A0R4J2V8 | Dirigent protein                               | 18 | 3  | 215  | 23.9  | 6.28 | 1.376 | 0.0264 | 20.1.7    |
| 218. | I1JQQ6     | J domain-containing protein                    | 22 | 5  | 343  | 38.8  | 6.74 | 1.372 | 0.0317 | 20.2.1    |
| 219. | A0A368UH97 | Uncharacterized protein                        | 26 | 12 | 568  | 63.9  | 7.68 | 1.368 | 0.0338 | #N/A      |
| 220. | I1MK76     | Pectinesterase                                 | 30 | 11 | 492  | 54.7  | 7.75 | 1.365 | 0.0498 | 10.8.1    |
| 221. | I1KPN5     | Uncharacterized protein                        | 50 | 33 | 708  | 78    | 5.24 | 1.358 | 0.0175 | 20.2.1    |
| 222. | I1MKN0     | Uncharacterized protein                        | 47 | 13 | 331  | 35    | 7.06 | 1.356 | 0.0414 | 1.1.1.2   |
| 223. | I1L1Q3     | Uncharacterized protein                        | 18 | 4  | 406  | 45.1  | 7.2  | 1.355 | 0.0419 | 29.5.3    |
| 224. | A0A368UGT8 | Uncharacterized protein                        | 53 | 13 | 463  | 50.4  | 5.14 | 1.351 | 0.0029 | 23.2      |
| 225. | C6ZS03     | Leucine rich repeat protein                    | 53 | 17 | 368  | 39.7  | 8.46 | 1.348 | 0.0032 | 35.1      |
| 226. | I1LWI3     | PHB domain-containing protein                  | 27 | 7  | 286  | 31.5  | 5.24 | 1.345 | 0.0212 | 35.1      |
| 227. | A0A0R0LB64 | Uncharacterized protein                        | 68 | 13 | 319  | 34.2  | 9.29 | 1.343 | 0.0038 | 34.19.1   |
| 228. | I1M841     | ATPase AAA core domain-containing protein      | 34 | 12 | 478  | 52.4  | 5.96 | 1.343 | 0.0284 | 1.3.13    |
| 229. | C6TIM5     | Ferredoxin--NADP reductase, chloroplastic      | 56 | 14 | 377  | 42.2  | 8.32 | 1.34  | 0.0318 | 7.3       |
| 230. | A0A0R0I4T4 | Uncharacterized protein                        | 45 | 4  | 296  | 31.7  | 7.85 | 1.338 | 0.0351 | 34.19.1   |
| 231. | I1K693     | Uncharacterized protein                        | 43 | 22 | 610  | 68.3  | 7.99 | 1.336 | 0.0339 | 30.5      |
| 232. | K7KZN7     | Uncharacterized protein                        | 19 | 17 | 1185 | 129.9 | 7.96 | 1.331 | 0.0174 | 10.8.1    |
| 233. | P08170     | Seed linoleate 13S-lipoxygenase-1              | 85 | 57 | 839  | 94.3  | 6.39 | 1.328 | 0.0068 | 17.7.1.2  |
| 234. | I1J6K4     | Uncharacterized protein                        | 45 | 27 | 928  | 102.9 | 6.7  | 1.327 | 0.0064 | 26.3.1    |
| 235. | I1K6M2     | Uncharacterized protein                        | 52 | 9  | 222  | 23.8  | 7.87 | 1.326 | 0.0351 | 20.2      |
| 236. | A0A0R4J3L4 | Usp domain-containing protein                  | 36 | 8  | 255  | 27.4  | 6.3  | 1.323 | 0.0166 | 20.2.99   |
| 237. | C6SXY4     | UBIQUITIN CONJUGAT 2 domain-containing protein | 42 | 3  | 167  | 18.7  | 5.19 | 1.323 | 0.0400 | 29.5.11.3 |
| 238. | A0A0R0JYY8 | Tubulin beta chain                             | 72 | 24 | 446  | 49.9  | 5.01 | 1.32  | 0.0400 | 31.1      |
| 239. | I1MWQ0     | Uncharacterized protein                        | 37 | 11 | 366  | 39.8  | 7.01 | 1.309 | 0.0112 | 35.2      |
| 240. | A0A0R0GWM0 | FAS1 domain-containing protein                 | 40 | 8  | 250  | 26.6  | 8.54 | 1.296 | 0.0169 | 10.5.1    |
| 241. | I1L4U2     | Serine hydroxymethyltransferase                | 65 | 21 | 517  | 57    | 7.59 | 1.294 | 0.0191 | 25.1      |
| 242. | C6TFW4     | Bet v 1 domain-containing protein              | 43 | 7  | 158  | 16.7  | 5.05 | 1.277 | 0.0297 | 20.2.99   |
| 243. | I1J8T0     | Isoflavone reductase                           | 56 | 13 | 318  | 35.6  | 5.47 | 1.272 | 0.0393 | 16.8.5    |
| 244. | I1MFN6     | Uncharacterized protein                        | 75 | 8  | 167  | 17.9  | 3.93 | 1.265 | 0.0406 | #N/A      |
| 245. | A0A0R0JCW2 | Uncharacterized protein                        | 43 | 18 | 583  | 66.2  | 6.29 | 1.264 | 0.0426 | #N/A      |
| 246. | A0A0R0HF66 | CSD 1 domain-containing protein                | 30 | 4  | 212  | 21    | 4.73 | 1.264 | 0.0429 | 27.3.75   |



|      |            |                                                      |    |    |     |      |       |       |        |                  |
|------|------------|------------------------------------------------------|----|----|-----|------|-------|-------|--------|------------------|
| 247. | C6T019     | Stress-response A/B barrel domain-containing protein | 81 | 7  | 105 | 11.8 | 5.77  | 1.261 | 0.0457 | 35.2             |
| 248. | Q53B72     | Chalcone-flavonone isomerase family protein          | 80 | 10 | 209 | 23.5 | 4.92  | 0.798 | 0.0485 | 16.8.2           |
| 249. | C6TER4     | NmrA domain-containing protein                       | 43 | 10 | 312 | 34.9 | 6.81  | 0.782 | 0.0473 | 16.2             |
| 250. | C6SWN5     | Uncharacterized protein                              | 28 | 4  | 120 | 13.7 | 11.6  | 0.774 | 0.0159 | 29.2.1.2.2.34    |
| 251. | C6SWV3     | Uncharacterized protein                              | 76 | 12 | 245 | 27.6 | 6.1   | 0.772 | 0.0145 | 35.2             |
| 252. | C6SVL1     | Ribosomal protein                                    | 60 | 14 | 216 | 24.6 | 9.82  | 0.771 | 0.0393 | 29.2.1.1.3.2.510 |
| 253. | I1MYB0     | Uncharacterized protein                              | 74 | 21 | 484 | 53.4 | 6.09  | 0.767 | 0.0113 | 15               |
| 254. | A0A0R0GZ36 | Uncharacterized protein                              | 55 | 10 | 377 | 41.3 | 5.99  | 0.764 | 0.0347 | 35.1             |
| 255. | A0A0R0F2G6 | Uncharacterized protein                              | 55 | 19 | 482 | 52.5 | 7.96  | 0.761 | 0.0233 | 13.2.4.1         |
| 256. | A0A0R0F392 | Cysteine synthase                                    | 27 | 9  | 372 | 40.1 | 7.14  | 0.748 | 0.0192 | 13.1.5.3.1       |
| 257. | C6SYW6     | 40S ribosomal protein S27                            | 24 | 2  | 86  | 9.6  | 8.73  | 0.739 | 0.0077 | 29.2.1.2.1.27    |
| 258. | I1L3Q2     | BOWMAN BIRK domain-containing protein                | 21 | 2  | 109 | 12.1 | 5.44  | 0.739 | 0.0297 | #N/A             |
| 259. | I1KNN1     | Uncharacterized protein                              | 48 | 5  | 158 | 17.6 | 10.4  | 0.738 | 0.0324 | 29.2.1.2.1.15    |
| 260. | A0A0R0GXL3 | MLO-like protein                                     | 15 | 4  | 539 | 61.3 | 10.45 | 0.73  | 0.0198 | 20.1.3.1         |
| 261. | I1JFL5     | Inhibitor I9 domain-containing protein               | 32 | 4  | 136 | 14.7 | 6.52  | 0.729 | 0.0224 | 35.1             |
| 262. | C6T336     | Uncharacterized protein                              | 39 | 7  | 135 | 15.7 | 9.98  | 0.724 | 0.0012 | 29.2.1.2.1.17    |
| 263. | I1N8I7     | Uncharacterized protein                              | 25 | 3  | 149 | 16.9 | 4.28  | 0.722 | 0.0054 | 30.3             |
| 264. | I1JW21     | Uncharacterized protein                              | 48 | 7  | 143 | 16   | 10.24 | 0.713 | 0.0156 | 29.2.1.2.1.19    |
| 265. | I1MW04     | Protein kinase domain-containing protein             | 8  | 3  | 360 | 40.9 | 4.89  | 0.713 | 0.0004 | 29.4             |
| 266. | I1MRJ8     | Uncharacterized protein                              | 20 | 11 | 722 | 78.9 | 8.68  | 0.71  | 0.0307 | 11.9.4.9         |
| 267. | I1LBB9     | Lipoxygenase                                         | 26 | 16 | 865 | 98.1 | 5.92  | 0.707 | 0.0104 | 17.7.1.2         |
| 268. | I1M5Q9     | Uncharacterized protein                              | 38 | 11 | 374 | 40.9 | 7.99  | 0.704 | 0.0070 | 35.2             |
| 269. | C6TAW2     | 40S ribosomal protein S24                            | 26 | 3  | 137 | 15.8 | 10.64 | 0.697 | 0.0014 | 29.2.1.2.1.24    |
| 270. | I1JC4      | Uncharacterized protein                              | 11 | 4  | 391 | 43.6 | 7.91  | 0.694 | 0.0156 | 23.1.1.2         |
| 271. | I1K0S0     | Ribosomal protein L15                                | 41 | 8  | 204 | 24.2 | 11.59 | 0.692 | 0.0035 | 29.2.1.2.2.15    |
| 272. | F7J077     | Beta-conglycinin beta subunit 2                      | 27 | 6  | 439 | 50.4 | 6.24  | 0.687 | 0.0458 | 33.1             |
| 273. | A0A0R0F139 | PKS ER domain-containing protein                     | 32 | 7  | 361 | 39.3 | 7.28  | 0.686 | 0.0028 | 16.2.1.10        |
| 274. | A0A0R4J4L3 | Annexin                                              | 41 | 14 | 312 | 35.9 | 7.91  | 0.685 | 0.0005 | 31.1             |
| 275. | I1J7H3     | Ferritin                                             | 37 | 7  | 257 | 28.7 | 6.18  | 0.679 | 0.0019 | 15.2             |
| 276. | A0A0R0F214 | U6 snRNA-associated Sm-like protein LSm4             | 9  | 2  | 165 | 18.9 | 5.27  | 0.669 | 0.0002 | 27.1             |
| 277. | I1KBE3     | Alba domain-containing protein                       | 28 | 4  | 241 | 27   | 10.13 | 0.657 | 0.0062 | 27.3.67          |

|      |            |                                          |    |    |      |       |       |       |        |               |
|------|------------|------------------------------------------|----|----|------|-------|-------|-------|--------|---------------|
| 278. | I1NA10     | Uncharacterized protein                  | 31 | 8  | 359  | 38.8  | 6.65  | 0.656 | 0.0000 | 13.1.3.5.4    |
| 279. | K7KIP5     | X8 domain-containing protein             | 8  | 3  | 489  | 53.4  | 6.25  | 0.655 | 0.0349 | 26.4          |
| 280. | C6SXI6     | 40S ribosomal protein S26                | 50 | 6  | 130  | 14.9  | 10.9  | 0.652 | 0.0062 | 29.2.1.2.1.26 |
| 281. | Q9SWB2     | Seed maturation protein PM41             | 35 | 2  | 78   | 8.2   | 4.97  | 0.65  | 0.0076 | 35.2          |
| 282. | I1KXC2     | PPDK N domain-containing protein         | 28 | 28 | 1459 | 163.7 | 6.84  | 0.646 | 0.0035 | 2.2.2.3       |
| 283. | I1L957     | Uncharacterized protein                  | 42 | 16 | 449  | 48.8  | 6.42  | 0.646 | 0.0000 | 33.2          |
| 284. | A0A0R0LK39 | Uncharacterized protein                  | 36 | 5  | 249  | 27.2  | 6.89  | 0.646 | 0.0002 | 20.2          |
| 285. | I1MUZ3     | AAI domain-containing protein            | 16 | 2  | 178  | 18.9  | 8.76  | 0.645 | 0.0022 | 26.21         |
| 286. | I1KY16     | Uncharacterized protein                  | 23 | 4  | 320  | 35.5  | 6.44  | 0.642 | 0.0073 | 23.1.3        |
| 287. | A0A0R4J3J1 | Peroxidase                               | 42 | 10 | 324  | 35.2  | 8.06  | 0.64  | 0.0000 | 20.2.2        |
| 288. | A0A0R0KSS1 | PKS ER domain-containing protein         | 24 | 7  | 343  | 37.9  | 6.27  | 0.638 | 0.0023 | 26.7          |
| 289. | I1KIS2     | Aldedh domain-containing protein         | 11 | 4  | 501  | 54.6  | 5.67  | 0.633 | 0.0336 | 5.1           |
| 290. | I1MEF8     | Clathrin light chain                     | 28 | 8  | 322  | 35.3  | 5.19  | 0.631 | 0.0346 | 35.2          |
| 291. | I1KWD8     | Uncharacterized protein                  | 10 | 2  | 451  | 49.8  | 5.27  | 0.611 | 0.0271 | 26.2          |
| 292. | I1N407     | Uncharacterized protein                  | 18 | 4  | 297  | 32.7  | 6.7   | 0.608 | 0.0183 | 35.2          |
| 293. | I1KY36     | TPRREGION domain-containing protein      | 19 | 6  | 482  | 54.5  | 6.09  | 0.601 | 0.0071 | 29.4          |
| 294. | A0A0R0EX12 | Histone H4                               | 33 | 5  | 156  | 17.9  | 11.36 | 0.6   | 0.0000 | 31.1          |
| 295. | C6TJP8     | Uncharacterized protein                  | 21 | 3  | 303  | 32.2  | 5.27  | 0.595 | 0.0054 | 29.5.11.20    |
| 296. | C6SXM8     | Ribosomal protein L19                    | 30 | 5  | 212  | 24.6  | 11.44 | 0.59  | 0.0076 | 29.2.1.2.2.19 |
| 297. | A0A0R0HEQ3 | Histone H2B                              | 23 | 3  | 149  | 16.2  | 10.08 | 0.586 | 0.0000 | 28.1.3        |
| 298. | A0A0R0JPL6 | Peptidase A1 domain-containing protein   | 44 | 10 | 468  | 50    | 8.24  | 0.579 | 0.0001 | 27.3.99       |
| 299. | Q9XET0     | Seed maturation protein PM30             | 34 | 5  | 140  | 15.1  | 8.9   | 0.577 | 0.0000 | 33.2          |
| 300. | A0A0R4J3J0 | Uncharacterized protein                  | 73 | 17 | 365  | 39.8  | 5.66  | 0.576 | 0.0042 | 16.2.1.9      |
| 301. | I1L7F3     | Ribosomal L14e domain-containing protein | 39 | 7  | 132  | 15.4  | 10.46 | 0.575 | 0.0000 | 29.2.1.2.2.14 |
| 302. | Q9ZTY1     | 35 kDa seed maturation protein           | 11 | 3  | 316  | 35.3  | 6.32  | 0.566 | 0.0012 | 33.2          |
| 303. | C6SWA6     | Histone H2A                              | 46 | 4  | 149  | 15.7  | 10.67 | 0.559 | 0.0000 | 28.1.3        |
| 304. | K7LUZ1     | Uncharacterized protein                  | 12 | 3  | 287  | 33.2  | 8.68  | 0.558 | 0.0000 | 35.2          |
| 305. | C6SZA4     | Histone H3                               | 45 | 5  | 136  | 15.3  | 11.3  | 0.551 | 0.0000 | 28.1.3        |
| 306. | O23957     | Dehydrin                                 | 34 | 3  | 166  | 17.3  | 9.23  | 0.551 | 0.0000 | 20.2.99       |
| 307. | I1MHL7     | Pectinesterase                           | 6  | 2  | 528  | 58.1  | 6.3   | 0.534 | 0.0245 | 10.8.1        |
| 308. | Q9S7N8     | Seed maturation protein PM21             | 48 | 2  | 95   | 10.1  | 5.01  | 0.53  | 0.0002 | 35.2          |

|      |            |                                                |    |    |      |       |       |       |        |               |
|------|------------|------------------------------------------------|----|----|------|-------|-------|-------|--------|---------------|
| 309. | A0A0R4J3P1 | Glutamine synthetase                           | 60 | 15 | 356  | 39.1  | 5.48  | 0.523 | 0.0005 | 12.2.2        |
| 310. | IIL053     | Uncharacterized protein                        | 37 | 9  | 342  | 39.2  | 5.74  | 0.515 | 0.0306 | 16.1.2.9      |
| 311. | I1JLC8     | Protein SLE2                                   | 49 | 5  | 105  | 11.5  | 5.6   | 0.515 | 0.0000 | 17.1.3        |
| 312. | K7M9Q3     | Chlorophyll a-b binding protein, chloroplastic | 25 | 3  | 260  | 27.6  | 6.6   | 0.507 | 0.0326 | 1.1.1.1       |
| 313. | I1NG96     | J domain-containing protein                    | 9  | 2  | 305  | 35.7  | 9.35  | 0.499 | 0.0003 | 20.2.1        |
| 314. | I1LJ14     | Uncharacterized protein                        | 13 | 7  | 770  | 81.5  | 9.04  | 0.486 | 0.0025 | 29.5.1        |
| 315. | K7KPN3     | Uncharacterized protein                        | 43 | 7  | 211  | 23.4  | 8.16  | 0.476 | 0.0014 | 30.5          |
| 316. | I1JPH6     | Lambda class glutathione S-transferase         | 18 | 3  | 235  | 26.8  | 6.01  | 0.468 | 0.0000 | 26.9          |
| 317. | A0A0R0F3E0 | Histone H2A                                    | 25 | 2  | 144  | 15.5  | 10.71 | 0.465 | 0.0000 | 28.1.3        |
| 318. | C6T197     | Bap31 domain-containing protein                | 40 | 3  | 129  | 14.9  | 8.79  | 0.446 | 0.0000 | 35.2          |
| 319. | A0A368UH16 | Aminotran 5 domain-containing protein          | 9  | 2  | 468  | 51.5  | 6.52  | 0.445 | 0.0000 | 30.1.1        |
| 320. | I1K554     | Knot1 domain-containing protein                | 23 | 2  | 74   | 8.4   | 9.16  | 0.435 | 0.0000 | 20.1          |
| 321. | A0A0R0IH13 | Uncharacterized protein                        | 36 | 4  | 127  | 15    | 8.31  | 0.433 | 0.0000 | 9.1.2         |
| 322. | K7N485     | Phenylalanine ammonia-lyase                    | 16 | 8  | 717  | 78.3  | 6.98  | 0.405 | 0.0000 | 16.2.1.1      |
| 323. | A0A0R4J4J7 | Uncharacterized protein                        | 23 | 6  | 320  | 35.7  | 9.54  | 0.396 | 0.0031 | 16.7          |
| 324. | I1J4F4     | Uncharacterized protein                        | 6  | 2  | 626  | 67.5  | 6.49  | 0.396 | 0.0008 | 21.2.2        |
| 325. | K7LEQ5     | Uncharacterized protein                        | 19 | 3  | 253  | 26.6  | 6.8   | 0.395 | 0.0000 | #N/A          |
| 326. | A0A0R4J3L3 | NADPH-protochlorophyllide oxidoreductase       | 26 | 7  | 399  | 43    | 9     | 0.359 | 0.0011 | 19.14         |
| 327. | A0A0R0LFG1 | Uncharacterized protein                        | 2  | 2  | 1066 | 118.6 | 6.55  | 0.355 | 0.0013 | 29.3.1        |
| 328. | K7KVC7     | Knot1 domain-containing protein                | 32 | 2  | 76   | 8.6   | 8.46  | 0.346 | 0.0000 | 20.1          |
| 329. | C6SWR8     | Ribonucloprotein                               | 66 | 4  | 128  | 13.8  | 7.12  | 0.342 | 0.0000 | 29.2.1.2.2.57 |
| 330. | K7KLV4     | Uncharacterized protein                        | 1  | 2  | 2392 | 269.9 | 5.36  | 0.342 | 0.0004 | 35.1          |
| 331. | A0A0R0FK13 | Uncharacterized protein                        | 9  | 2  | 422  | 46.5  | 6.6   | 0.301 | 0.0001 | 34.12         |
| 332. | I1JA20     | MINDY DUB domain-containing protein            | 7  | 5  | 726  | 79.6  | 4.65  | 0.259 | 0.0000 | 35.2          |
| 333. | P11827     | Beta-conglycinin alpha' subunit                | 22 | 10 | 621  | 72.2  | 5.71  | 0.238 | 0.0000 | 33.1          |
| 334. | A0A0R0HS93 | Uncharacterized protein                        | 7  | 10 | 1141 | 133.1 | 5.85  | 0.158 | 0.0000 | 29.5.11       |
| 335. | I1K1Z8     | PCI domain-containing protein                  | 24 | 8  | 423  | 47.6  | 6.55  | 0.113 | 0.0000 | 30.11.1       |
| 336. | A0A0R0EAL6 | PKS ER domain-containing protein               | 52 | 13 | 357  | 39    | 5.8   | 0.11  | 0.0000 | 16.2.1.10     |
| 337. | A0A0R0EXW6 | AAA domain-containing protein                  | 58 | 17 | 446  | 49.5  | 6.21  | 0.01  | 0.0000 | 29.5.11.20    |
| 338. | A0A368UHI2 | Uncharacterized protein                        | 42 | 16 | 543  | 57.7  | 5.33  | 0.01  | 0.0000 | 20.2.1        |
| 339. | K7KYQ4     | Uncharacterized protein                        | 26 | 8  | 605  | 68    | 7.52  | 0.01  | 0.0000 | 27.1.1        |

|      |            |                                          |    |   |     |      |      |      |        |           |
|------|------------|------------------------------------------|----|---|-----|------|------|------|--------|-----------|
| 340. | K7MUD9     | AB hydrolase-1 domain-containing protein | 23 | 7 | 520 | 58.2 | 7.83 | 0.01 | 0.0000 | 29.5      |
| 341. | IIM6R4     | Uncharacterized protein                  | 51 | 7 | 188 | 20.2 | 8.13 | 0.01 | 0.0000 | 27.1.19   |
| 342. | IIMV80     | Cupin 2 domain-containing protein        | 47 | 6 | 293 | 33   | 6.61 | 0.01 | 0.0000 | 27.3.30   |
| 343. | I1K354     | Uncharacterized protein                  | 17 | 6 | 398 | 45.1 | 6.87 | 0.01 | 0.0000 | 23.1.1.2  |
| 344. | I1J575     | Uncharacterized protein                  | 35 | 5 | 259 | 28.8 | 8.51 | 0.01 | 0.0000 | 29.3.4.99 |
| 345. | A0A0R0JMD5 | Uncharacterized protein                  | 35 | 5 | 192 | 21.1 | 5.01 | 0.01 | 0.0000 | 29.5.11   |
| 346. | I1JJW5     | Uncharacterized protein                  | 10 | 4 | 549 | 61.5 | 5.83 | 0.01 | 0.0000 | 30.3      |
| 347. | I1KSL3     | Uncharacterized protein                  | 7  | 4 | 837 | 89.9 | 5.55 | 0.01 | 0.0000 | 29.4      |
| 348. | P0DO16     | Beta-conglycinin alpha subunit 1         | 8  | 3 | 605 | 70.3 | 5.17 | 0.01 | 0.0000 | 33.1      |
| 349. | I1LNG0     | Uncharacterized protein                  | 7  | 2 | 552 | 63   | 8.85 | 0.01 | 0.0000 | 17.2.3    |
| 350. | I1KU65     | Uncharacterized protein                  | 7  | 2 | 369 | 40.3 | 6.87 | 0.01 | 0.0000 | 26.7      |
| 351. | I1KZY8     | Uncharacterized protein                  | 6  | 2 | 536 | 59   | 5.12 | 0.01 | 0.0000 | 27.2      |

<sup>a)</sup> Matched peptide, <sup>b)</sup> amino acids, <sup>c)</sup> molecular weight, <sup>d)</sup> calculated isoelectric point, <sup>e)</sup> MapMan bin codes taken from <https://mapman.gabipd.org/>
